# Supplementary material for: Grafting of a rhenium-oxo complex on Schiff base functionalized graphene oxide: an efficient catalyst for the oxidation of amines
Source: Royal Society of Chemistry journal article supplement (doi:10.1039/c3dt53421a), 2014-01-01

## Supporting Information

### **Grafting of Rhenium-oxo complex to Schiff base functionalized graphene oxide: an efficient catalyst for the oxidation of amines.**

Praveen K. Khatri,<sup>a</sup> Shivani Choudhary,<sup>a</sup> Raghuvir Singh,<sup>b</sup> Suman L. Jain<sup>a\*</sup>, Om P. Khatri<sup>a\*</sup>

<sup>a</sup>Chemical Sciences Division, CSIR-Indian Institute of Petroleum, Dehradun-248005, India; Tel.: +91-135-2525788; Fax. +91-135-2660202; Email: [suman@iip.res.in](mailto:suman@iip.res.in); [opkhatri@iip.res.in](mailto:opkhatri@iip.res.in)

<sup>b</sup>Analytical Sciences Division, CSIR- Indian Institute of Petroleum, Dehradun-248005, India

**Table S1:** Infrared vibration frequencies of GrO, GrO-MTO, and intermediate products with their vibrational assignments.

| GrO    | GrO-APTMS | GrO-SB | GrO-MTO | Assignment                          |
|--------|-----------|--------|---------|-------------------------------------|
| 3409.4 |           | 3459.2 | 3424.9  | O-H stretch                         |
|        | 3423.7    |        |         | N-H / O-H stretch                   |
|        | 2926.5    | 2928.3 | 2930.1  | C-H asym stretch (CH <sub>2</sub> ) |
|        | 2858.9    |        |         | C-H sym stretch (CH <sub>2</sub> )  |
|        | 2960.9    |        |         | C-H asym stretch (CH <sub>3</sub> ) |
| 1724.9 |           |        |         | C=O stretch                         |
| 1622.0 | 1630.4    | 1632.4 | 1632.6  | C=C stretch                         |
|        |           | 1582.0 | 1591.8  | C=N stretch                         |
|        | 1573.2    |        |         | N-H bending                         |
| 1229.0 |           |        | 1229.0  | C-O stretch                         |
|        | 1195.9    | 1195.3 |         | C-N stretch                         |
|        | 1121.5    | 1117.7 | 1131.1  | Si-O-Si stretch                     |
| 1073.9 |           |        |         | C-O-C stretch (epoxy)               |
|        | 1034.6    | 1050.5 | 1048.0  | Si-O-C stretch                      |
|        |           |        | 912.2   | Re=O stretch                        |
|        |           | 756.6  | 768.8   | C-H bending (ortho)                 |

Fig. S1: TG-DTA curve of graphene oxide

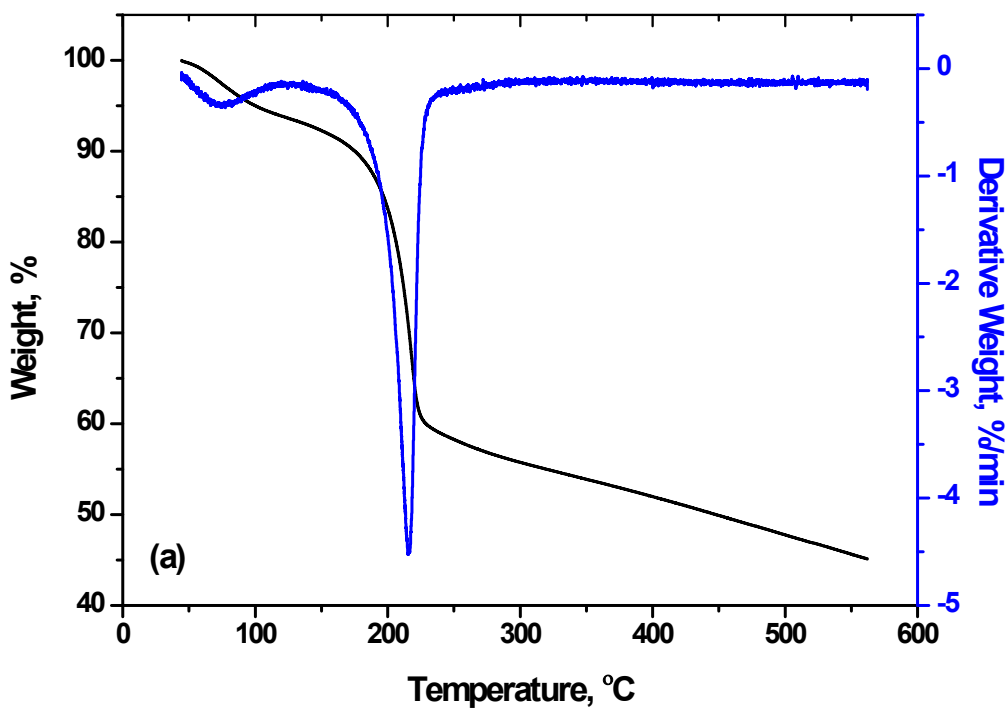

Fig. S2: TG-DTA curve for the GrO-MTO catalyst

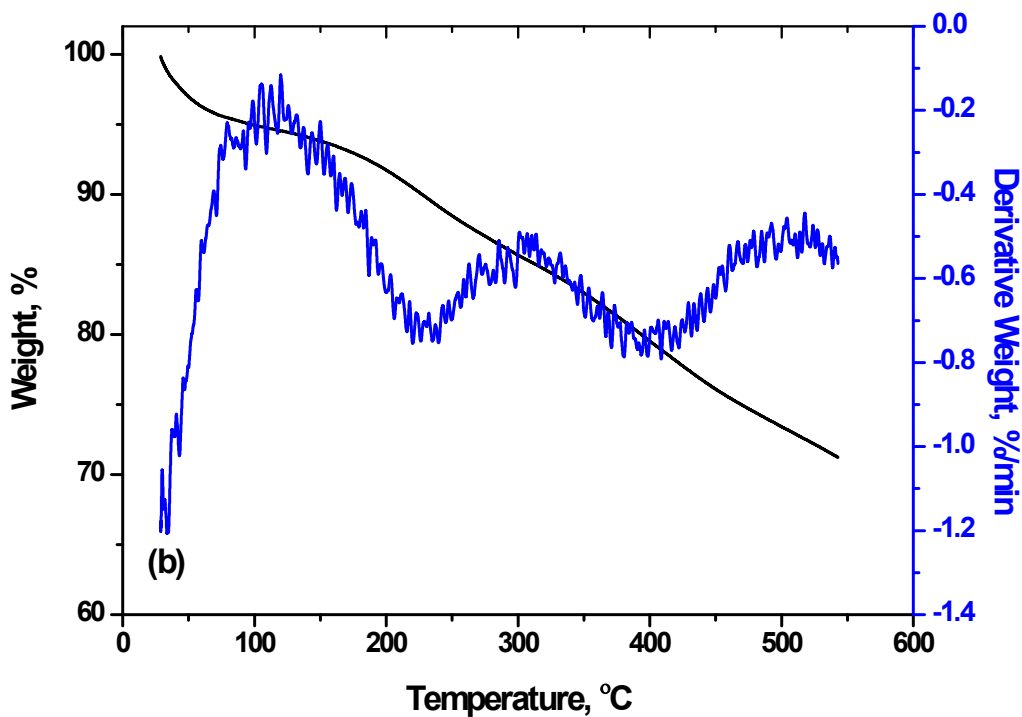

**Fig. S3:** FESEM images of (a) pristine graphite powder used for preparation of graphene oxide, (b) graphene oxide, and (c) GrO-MTO catalyst.

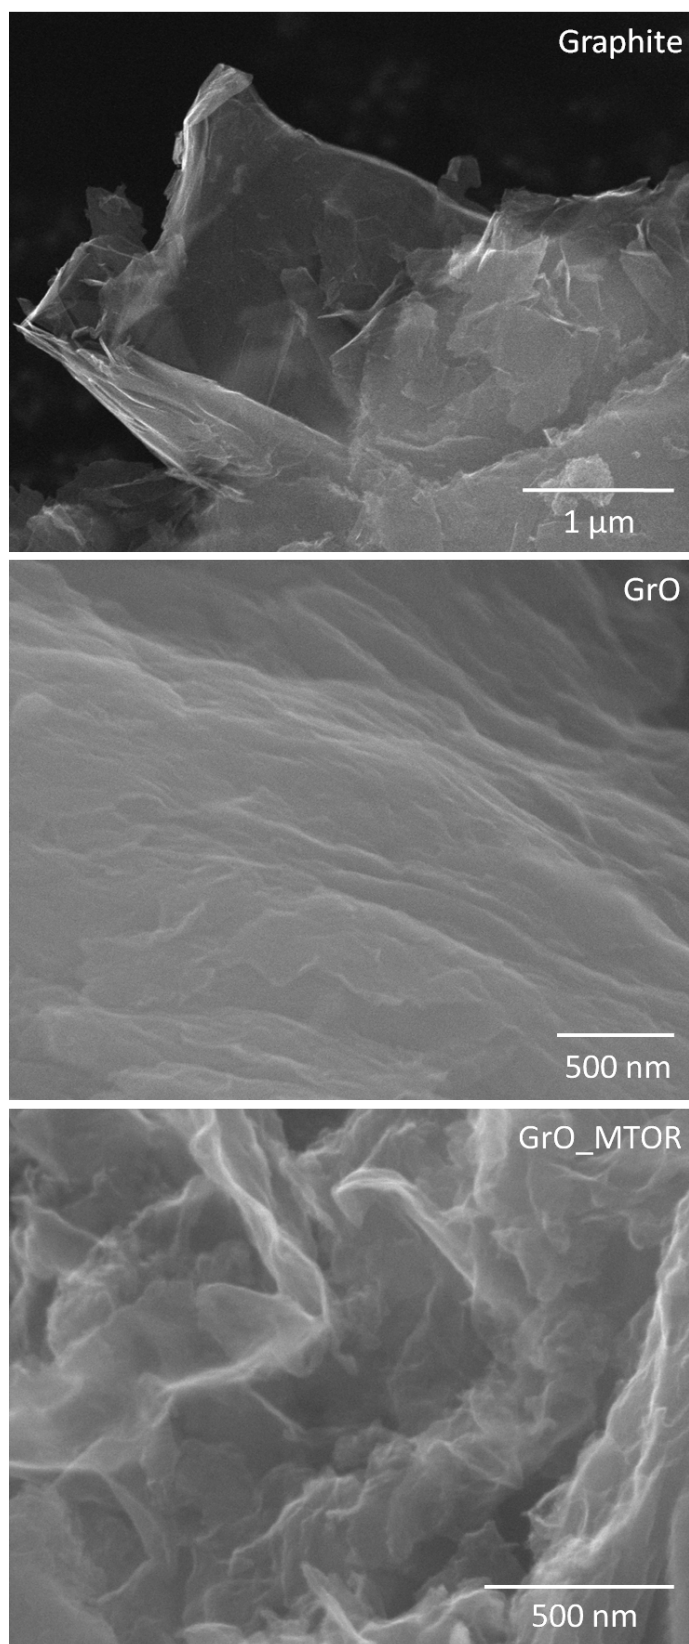

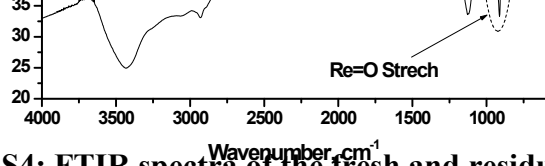

Fig. S4: FTIR spectra of the fresh and residual (recovered) catalysts IV after third run

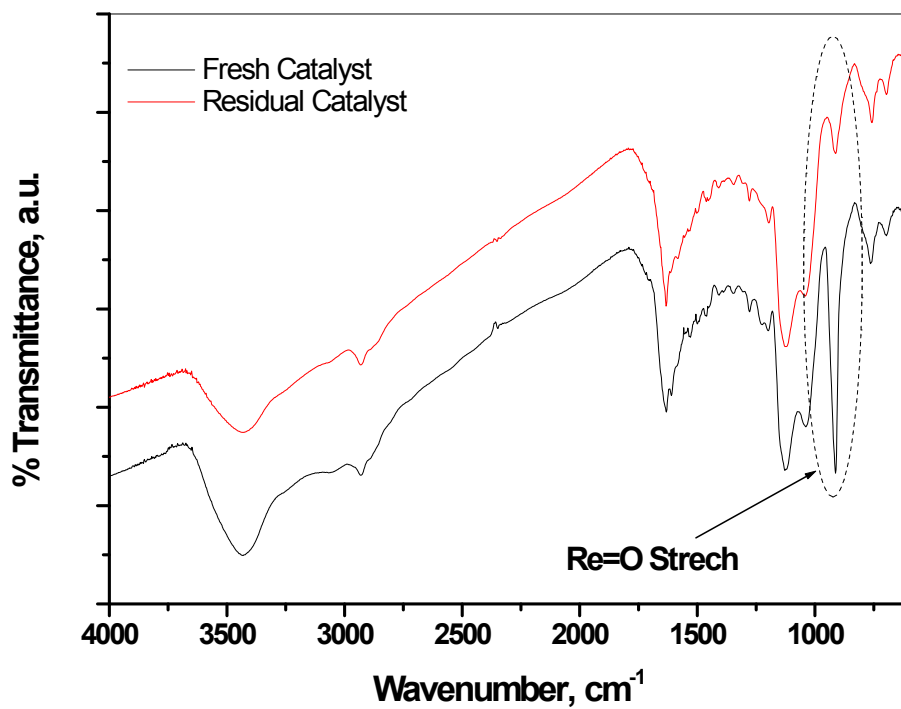

Fig. S5: FTIR of Fresh GrO and after its reaction with  $H_2O_2$  at 60 °C in methanol.

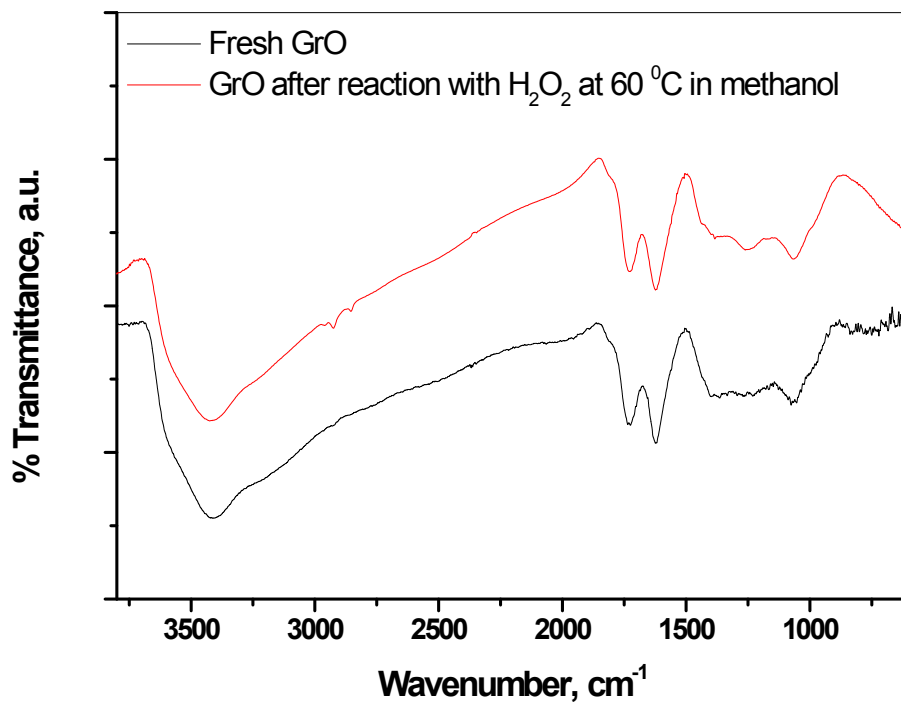

Supplement: c3dt53421a1.pdf [file c3dt53421a1.pdf]
